# Supplementary material for: Contactless cardiac arrest detection using smart devices
Source: PubMed Central journal article supplement (PMC6584582; doi:10.1038/s41746-019-0128-7), 2019-06-19
Supplement: 41746_2019_128_MOESM1_ESM.pdf [file 41746_2019_128_MOESM1_ESM.pdf]

|              | Gender | Age (yrs)     | Recording period (mins) | Hypopneas     | Central apneas | Obstructive apneas | AHI              |
|--------------|--------|---------------|-------------------------|---------------|----------------|--------------------|------------------|
| Patient 1    | Female | 58            | 456                     | 16            | 52             | 3                  | 9.3              |
| Patient 2    | Male   | 46            | 464                     | 26            | 157            | 11                 | 25.1             |
| Patient 3    | Female | 60            | 471                     | 113           | 1              | 45                 | 20.3             |
| Patient 4    | Male   | 59            | 462                     | 105           | 8              | 112                | 29.2             |
| Patient 5    | Female | 57            | 466                     | 30            | 3              | 15                 | 6.2              |
| Patient 6    | Male   | 68            | 435                     | 6             | 2              | 6                  | 1.9              |
| Patient 7    | Male   | 37            | 442                     | 2             | 0              | 0                  | 0.3              |
| Patient 8    | Male   | 35            | 373                     | 80            | 33             | 88                 | 32.4             |
| Patient 9    | Female | 59            | 291                     | 57            | 18             | 9                  | 17.3             |
| Patient 10   | Female | 93            | 304                     | 20            | 16             | 6                  | 8.3              |
| Patient 11   | Male   | 56            | 393                     | 21            | 1              | 11                 | 5.0              |
| Patient 12   | Female | 50            | 441                     | 20            | 0              | 5                  | 3.4              |
| Mean (range) |        | 57<br>(35-93) | 416<br>(291-471)        | 41<br>(2-113) | 24<br>(0-157)  | 26<br>(0-112)      | 13<br>(0.3-32.4) |

**Supplementary Table 1.** Demographic summary of sleep study patients with number of hypopnea and apnea events as well as the apneas-hypopneas index (AHI)
